# Supplementary material for: On the influence of water molecules on the outer electronic shells of R–SeH, R–Se(−) and R–SeOH fragments in the selenocysteine amino acid residue
Source: Royal Society of Chemistry journal article supplement (doi:10.1039/d1cp01345a), 2021-01-01
Supplement: d1cp01345a1.pdf [file d1cp01345a1.pdf]

Supporting Information for

## On the influence of water molecules on the outer electronic shells of R–SeH, R–Se(–) and R–SeOH fragments in selenocysteine amino acid residue

*Elena Yu. Tupikina,\*<sup>a</sup> Valerii .V. Karpov,<sup>a</sup> Peter M. Tolstoy\*<sup>a</sup>*

<sup>a</sup> Institute of Chemistry, Saint Petersburg State University, Universitetskaya Emb. 7/9, Saint Petersburg, Russia, 199034

Corresponding Authors: elenatupikina@gmail.com, [peter.tolstoy@spbu.ru](mailto:peter.tolstoy@spbu.ru)

### Table of contents

|                                                                                                                                                                     | Page |
|---------------------------------------------------------------------------------------------------------------------------------------------------------------------|------|
| FigureS1. Structures of some conformers of CH <sub>3</sub> Se(–)·nH <sub>2</sub> O, n = 2 and 3                                                                     | 2    |
| Table S1. Energies of OH···Se hydrogen bonds for CH <sub>3</sub> Se(–)·nH <sub>2</sub> O clusters                                                                   | 3    |
| Figure S2. Isosurfaces of electronic density mapped by molecular electrostatic potential for CH <sub>3</sub> S(–) and CH <sub>3</sub> Se(–).                        | 4    |
| Coordinates, full electronic energies, free energies and enthalpies for CH <sub>3</sub> Se(–)·nH <sub>2</sub> O (n = 0–6) complexes                                 | 5    |
| Coordinates, full electronic energies, free energies and enthalpies for CH <sub>3</sub> SeH·nH <sub>2</sub> O (n = 0–2) complexes                                   | 10   |
| Coordinates, full electronic energies, free energies and enthalpies for CH <sub>3</sub> SeOH·nH <sub>2</sub> O (n = 0–3) complexes                                  | 12   |
| NMR data for CH <sub>3</sub> Se(–)·nH <sub>2</sub> O (n= 1–6), CH <sub>3</sub> SeH·kH <sub>2</sub> O (k = 0, 2), CH <sub>3</sub> SeOH·mH <sub>2</sub> O (m = 0, 3). | 15   |

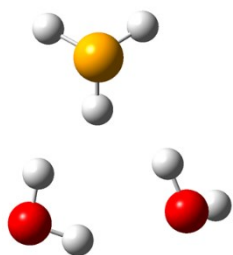

0.0 kcal/mol

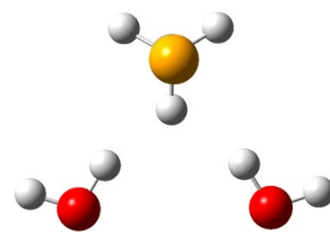

+0.9 kcal/mol

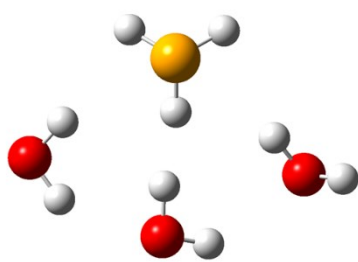

0.0 kcal/mol

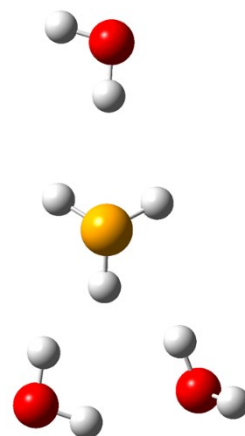

+0.6 kcal/mol

**Figure S1.** Structures of some conformers of  $\text{CH}_3\text{Se}(-)\cdot n\text{H}_2\text{O}$ ,  $n = 2$  and 3.

**Table S1.** Energies of OH...Se hydrogen bonds for CH<sub>3</sub>Se(-)·*n*H<sub>2</sub>O clusters that contains water molecules involved only in a single hydrogen bond.

| <i>n</i> = 1 | $\Delta E$ , kcal/mol |
|--------------|-----------------------|
| 1            | -5.59                 |
| 2            | -5.85                 |
| 3 (2 + 1)    | -5.21                 |
| 4 (3 + 1)    | -5.13                 |

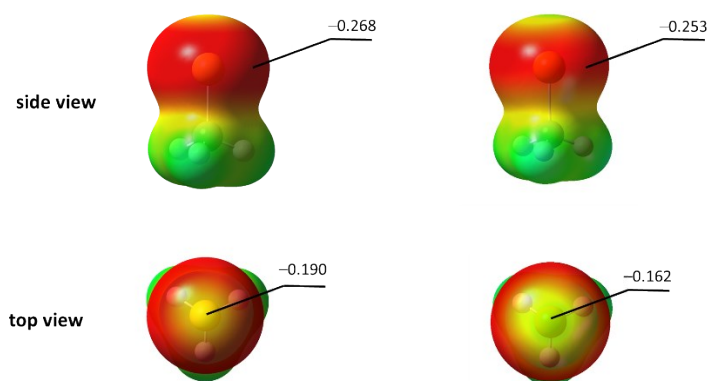

**Figure S2.** Isosurfaces of 0.01 a.u. electronic density mapped by molecular electrostatic potential for  $\text{CH}_3\text{S}^-$  (left) and for  $\text{CH}_3\text{Se}^-$  (right).

## Coordinates of $\text{CH}_3\text{Se}(-)\cdot n\text{H}_2\text{O}$ ( $n = 0-6$ ) complexes calculated at MP2/aug-cc-pVTZ level

### $\text{CH}_3\text{Se}(-)$

Full electronic energy -2439.9557934  
Sum of electronic and zero-point Energies -2439.919614  
Sum of electronic and thermal Energies -2439.916486  
Sum of electronic and thermal Enthalpies -2439.915542  
Sum of electronic and thermal Free Energies -2439.944550

Coordinates (opt=tight freq mp2/aug-cc-pvtz)

|    |             |             |             |
|----|-------------|-------------|-------------|
| Se | -0.43851300 | 0.00000000  | 0.00000000  |
| C  | 1.52892600  | 0.00000000  | 0.00000000  |
| H  | 1.91196400  | -0.50361400 | 0.88839800  |
| H  | 1.91196400  | -0.51756900 | -0.88034100 |
| H  | 1.91196400  | 1.02118200  | -0.00805700 |

### $\text{CH}_3\text{Se}(-)\cdot\text{H}_2\text{O}$

Full electronic energy -2516.4033169

Coordinates (opt=tight mp2/aug-cc-pvtz scrf=(cpcm,solvent=water))

|    |             |             |             |
|----|-------------|-------------|-------------|
| Se | 0.53106500  | -0.46589300 | 0.00480700  |
| C  | 0.87188900  | 1.47067400  | -0.00840600 |
| H  | -0.06966700 | 2.01338900  | -0.05773000 |
| H  | 1.39928900  | 1.76572900  | 0.89547900  |
| H  | 1.47679100  | 1.74003100  | -0.87084100 |
| O  | -2.68269800 | 0.14685200  | -0.10358000 |
| H  | -2.91023600 | 0.39954400  | 0.79740600  |
| H  | -1.72213600 | -0.07719900 | -0.04867600 |

### $\text{CH}_3\text{Se}(-)\cdot 2\text{H}_2\text{O}$

Full electronic energy -2592.859928

Coordinates (opt=tight mp2/aug-cc-pvtz scrf=(cpcm,solvent=water))

|    |             |             |             |
|----|-------------|-------------|-------------|
| Se | 0.88070200  | -0.05447100 | -0.44658800 |
| C  | 1.01884100  | 0.19671600  | 1.49814000  |
| H  | 1.63955300  | -0.58296300 | 1.93251600  |
| H  | 1.46038700  | 1.16506300  | 1.72008200  |
| H  | 0.02836600  | 0.14875000  | 1.94612100  |
| O  | -2.01088700 | -1.53743400 | 0.20013800  |
| H  | -2.42518500 | -0.66251400 | 0.22671200  |
| H  | -1.09158100 | -1.28920300 | -0.04107200 |
| O  | -2.05864300 | 1.38623900  | -0.17549100 |
| H  | -1.13551000 | 1.06278200  | -0.31450100 |
| H  | -1.97669900 | 2.03935700  | 0.52812600  |

### **CH<sub>3</sub>Se(-)·3H<sub>2</sub>O**

Full electronic energy -2668.6900516

Coordinates (opt=tight mp2/aug-cc-pvtz scrf=(cpcm,solvent=water))

|    |             |             |             |
|----|-------------|-------------|-------------|
| Se | -0.36349200 | -0.03593800 | -0.35911400 |
| C  | -0.30345400 | -0.24294200 | 1.61453500  |
| H  | -0.68533800 | -1.23231000 | 1.90505400  |
| H  | 0.73323800  | -0.14325500 | 1.96843800  |
| H  | -0.91800500 | 0.53196400  | 2.09519200  |
| O  | -3.71219100 | 0.02416300  | -0.16952100 |
| H  | -3.92505100 | 0.91728800  | 0.13507400  |
| H  | -2.73184300 | 0.04164400  | -0.26838700 |
| O  | 2.74507200  | -1.26447800 | -0.30265900 |
| H  | 2.77724300  | -1.90810500 | 0.41933700  |
| H  | 1.78585800  | -1.04430700 | -0.38147900 |
| O  | 2.53711900  | 1.65779600  | 0.06060100  |
| H  | 1.60893800  | 1.38839100  | -0.11368800 |
| H  | 2.97440200  | 0.78839100  | 0.05576000  |

**CH<sub>3</sub>Se(-)·4H<sub>2</sub>O**

Full electronic energy -2745.445213

Coordinates (opt=tight mp2/aug-cc-pvtz scrf=(cpcm,solvent=water))

|    |             |             |             |
|----|-------------|-------------|-------------|
| Se | 0.00182400  | -0.59711800 | -0.40543700 |
| C  | 0.01758500  | -0.74349600 | 1.55388200  |
| H  | 0.10387300  | -1.78696600 | 1.84517100  |
| H  | 0.86146100  | -0.18726000 | 1.95556800  |
| H  | -0.90492200 | -0.33429400 | 1.95912800  |
| O  | -2.04014800 | 1.92808000  | 0.18692700  |
| H  | -2.00520800 | 2.62001400  | -0.48292000 |
| H  | -1.34264100 | 1.29073900  | -0.08891000 |
| O  | -3.34425500 | -0.67573300 | -0.13023900 |
| H  | -3.29676300 | 0.28342800  | -0.00000400 |
| H  | -2.40328900 | -0.87925100 | -0.29937500 |
| O  | 1.95266600  | 2.08365500  | 0.02509100  |
| H  | 1.23031100  | 1.44965300  | -0.16118700 |
| H  | 2.70645100  | 1.47791900  | 0.08516600  |
| O  | 3.30588400  | -0.51429800 | -0.16339800 |
| H  | 3.54636400  | -1.06803800 | 0.58759200  |
| H  | 2.34365800  | -0.67660300 | -0.28570800 |

**CH<sub>3</sub>Se(-)·5H<sub>2</sub>O**

Full electronic energy -2821.7903872

Coordinates (opt=tight mp2/aug-cc-pvtz scrf=(cpcm,solvent=water))

|    |             |             |             |
|----|-------------|-------------|-------------|
| Se | -0.01529500 | 0.01964100  | -0.36972800 |
| C  | -0.02256800 | -0.00359200 | 1.59574800  |
| H  | -0.07303100 | 1.01521500  | 1.97178100  |
| H  | -0.88510600 | -0.56228800 | 1.95065000  |
| H  | 0.88682800  | -0.47617800 | 1.95880800  |
| O  | 0.20299600  | 3.32342000  | -0.15140900 |

|   |             |             |             |
|---|-------------|-------------|-------------|
| H | 0.99355900  | 3.46658000  | 0.37985700  |
| H | 0.16787800  | 2.34950600  | -0.26159100 |
| O | -3.24320100 | 0.61894900  | 0.12355000  |
| H | -3.66527000 | 1.15409200  | -0.55766600 |
| H | -2.29724400 | 0.59815400  | -0.13770300 |
| O | 2.33913600  | -2.27648200 | 0.05069900  |
| H | 1.56287800  | -1.73093500 | -0.20060300 |
| H | 2.41395100  | -2.92259800 | -0.66024200 |
| O | -2.52483300 | -2.21047800 | -0.11910300 |
| H | -3.11122800 | -1.44510400 | -0.02038200 |
| H | -1.67152000 | -1.76324800 | -0.27764300 |
| O | 3.30304400  | 0.48883800  | -0.02588300 |
| H | 2.34774700  | 0.59336600  | -0.19882900 |
| H | 3.36886900  | -0.47679600 | 0.02699200  |

### CH<sub>3</sub>Se(-)·6H<sub>2</sub>O

Full electronic energy -2898.1364044

Sum of electronic and zero-point Energies -2897.344845

Sum of electronic and thermal Energies -2897.322054

Sum of electronic and thermal Enthalpies -2897.321110

Sum of electronic and thermal Free Energies -2897.403199

Coordinates (opt=tight freq mp2/aug-cc-pvtz scrf=(cpcm,solvent=water))

|    |             |             |             |
|----|-------------|-------------|-------------|
| Se | 0.00078700  | -0.00038300 | -0.32413900 |
| C  | 0.00106700  | 0.00092300  | 1.64051300  |
| H  | -0.72809600 | -0.71918700 | 2.00329300  |
| H  | 0.98953400  | -0.26998300 | 2.00295400  |
| H  | -0.25823500 | 0.99277000  | 2.00220600  |
| O  | -3.05004000 | -1.49338900 | -0.12269900 |
| H  | -2.57187400 | -2.32992000 | -0.01624300 |
| H  | -2.30713400 | -0.87934100 | -0.26736400 |
| O  | -0.72993200 | -3.25448900 | -0.11005900 |



|   |             |             |             |
|---|-------------|-------------|-------------|
| H | -0.29915700 | -3.58151100 | 0.68769300  |
| H | -0.38894400 | -2.34060500 | -0.21116200 |
| O | -2.45555600 | 2.25612800  | -0.10400800 |
| H | -1.83401500 | 1.50475400  | -0.20778300 |
| H | -2.95267200 | 2.04433600  | 0.69409900  |
| O | 2.82038200  | -1.89308600 | -0.10715300 |
| H | 3.30466400  | -1.05942000 | -0.00602100 |
| H | 1.91700500  | -1.55908200 | -0.25609800 |
| O | 0.22826700  | 3.38860300  | -0.11614200 |
| H | 0.38974900  | 2.43876500  | -0.26322800 |
| H | -0.73524600 | 3.39150800  | -0.00953500 |
| O | 3.18310800  | 0.99611800  | -0.11855700 |
| H | 3.25024300  | 1.54162900  | 0.67315600  |
| H | 2.22119700  | 0.83368700  | -0.21937800 |

### Coordinates of CH<sub>3</sub>SeH·*n*H<sub>2</sub>O (*n* = 0–2) complexes calculated at MP2/aug-cc-pVTZ level

#### CH<sub>3</sub>SeH

Full electronic energy –2440.5172992

Sum of electronic and zero-point Energies -2440.471973

Sum of electronic and thermal Energies -2440.468232

Sum of electronic and thermal Enthalpies -2440.467288

Sum of electronic and thermal Free Energies -2440.497620

Coordinates (opt=tight freq mp2/aug-cc-pvtz)

|    |             |             |             |
|----|-------------|-------------|-------------|
| H  | 0.58965200  | 1.39752300  | 0.00000100  |
| Se | 0.41707800  | -0.04421500 | 0.00000000  |
| C  | -1.52335900 | 0.01675100  | 0.00000000  |
| H  | -1.85449000 | -1.01793000 | 0.00000000  |
| H  | -1.88783600 | 0.51161100  | 0.89356500  |
| H  | -1.88783600 | 0.51161200  | -0.89356300 |

#### CH<sub>3</sub>SeH·1H<sub>2</sub>O

Full electronic energy –2516.5868779

Coordinates (opt=tight mp2/aug-cc-pvtz scrf=(cpcm,solvent=water))

|    |             |             |             |
|----|-------------|-------------|-------------|
| H  | -0.80965600 | -0.28831600 | -0.01191600 |
| Se | 0.64906400  | -0.45949600 | 0.00134200  |
| C  | 1.05232800  | 1.46148900  | -0.00425100 |
| H  | 2.14719700  | 1.54824900  | 0.00483300  |
| H  | 0.65410800  | 1.92997000  | -0.91260100 |
| H  | 0.63849600  | 1.93853100  | 0.89259200  |
| O  | -2.99078500 | 0.21766900  | -0.01036000 |
| H  | -3.59244300 | -0.07212500 | -0.71082900 |
| H  | -3.49356600 | 0.05628500  | 0.80068800  |

#### CH<sub>3</sub>SeH·2H<sub>2</sub>O

Full electronic energy –2592.8626986

|                                             |              |
|---------------------------------------------|--------------|
| Sum of electronic and zero-point Energies   | -2592.771538 |
| Sum of electronic and thermal Energies      | -2592.759885 |
| Sum of electronic and thermal Enthalpies    | -2592.758940 |
| Sum of electronic and thermal Free Energies | -2592.813691 |

Coordinates (opt=tight freq mp2/aug-cc-pvtz scrf=(cpcm,solvent= water))

|    |             |             |             |
|----|-------------|-------------|-------------|
| H  | 0.00000100  | -0.15062600 | 1.60278900  |
| Se | 0.00000000  | -0.20384400 | 0.15105800  |
| C  | 0.00000200  | 1.72074200  | -0.10892400 |
| H  | 0.00000100  | 1.87552000  | -1.18370000 |
| H  | -0.89398300 | 2.15065700  | 0.32829600  |
| H  | 0.89398800  | 2.15065500  | 0.32829500  |
| O  | 3.41367600  | -0.55634500 | -0.34087400 |
| H  | 3.81718000  | 0.19442800  | 0.10752500  |
| H  | 2.46580800  | -0.45365600 | -0.15958300 |
| O  | -3.41367700 | -0.55634600 | -0.34087200 |
| H  | -2.46580900 | -0.45365600 | -0.15958200 |
| H  | -3.81717900 | 0.19443900  | 0.10750900  |

**Coordinates of CH<sub>3</sub>SeOH·nH<sub>2</sub>O (n = 0–3) complexes calculated at MP2/aug-cc-pVTZ level**

**CH<sub>3</sub>SeOH**

Full electronic energy –2515.6362341

Sum of electronic and zero-point Energies -2515.584914

Sum of electronic and thermal Energies -2515.580175

Sum of electronic and thermal Enthalpies -2515.579231

Sum of electronic and thermal Free Energies -2515.612865

Coordinates (opt=tight freq mp2/aug-cc-pvtz)

|    |             |             |             |
|----|-------------|-------------|-------------|
| Se | -0.07429400 | -0.43513500 | 0.00393900  |
| O  | -1.29335100 | 0.89431700  | -0.11638100 |
| H  | -1.54834700 | 1.10639200  | 0.79054800  |
| C  | 1.50221500  | 0.66586000  | 0.00277000  |
| H  | 2.34933000  | -0.01946600 | -0.02708600 |
| H  | 1.50557300  | 1.28853600  | -0.88686300 |
| H  | 1.55297600  | 1.26943600  | 0.90389300  |

**CH<sub>3</sub>SeOH·1H<sub>2</sub>O**

Full electronic energy –2591.6380861

Coordinates (opt=tight mp2/aug-cc-pvtz scrf=(cpcm,solvent=water))

|    |             |             |             |
|----|-------------|-------------|-------------|
| Se | 0.53837600  | -0.01188500 | -0.44731100 |
| O  | 1.22333400  | -0.98278600 | 0.96032500  |
| H  | 2.14908900  | -0.70071300 | 1.04781400  |
| C  | -0.19525500 | 1.46499800  | 0.57990600  |
| H  | -0.76283100 | 2.07913400  | -0.13844700 |
| H  | -0.88298700 | 1.07259100  | 1.34008400  |
| H  | 0.60912700  | 2.06235600  | 1.02821000  |
| O  | -2.83700400 | -0.39634100 | 0.11579600  |
| H  | -3.38436700 | -1.18446000 | 0.00761200  |
| H  | -1.95193600 | -0.68178000 | -0.16512100 |

**CH<sub>3</sub>SeOH·2H<sub>2</sub>O**

Full electronic energy -2667.9110655

Coordinates (opt=tight mp2/aug-cc-pvtz scrf=(cpcm,solvent=water))

|    |             |             |             |
|----|-------------|-------------|-------------|
| Se | -0.03549900 | -0.16971100 | -0.48708900 |
| O  | 0.71878700  | -1.02768500 | 0.94243100  |
| H  | 1.65687900  | -0.74216300 | 0.92460500  |
| C  | -0.48861200 | 1.50014800  | 0.40079600  |
| H  | -1.03187500 | 2.10824000  | -0.34080800 |
| H  | -1.14885200 | 1.28888300  | 1.25186300  |
| H  | 0.42538100  | 2.01890600  | 0.71843300  |
| O  | 3.16334200  | 0.25782900  | 0.22932800  |
| H  | 4.04010300  | -0.10029500 | 0.03800100  |
| H  | 2.75118000  | 0.38364000  | -0.63955600 |
| O  | -3.38443400 | -0.08734200 | 0.30022200  |
| H  | -3.99212800 | -0.83248100 | 0.38920600  |
| H  | -2.54361800 | -0.49786600 | 0.03864400  |

**CH<sub>3</sub>SeOH·3H<sub>2</sub>O**

Full electronic energy -2744.6613968

Coordinates (opt=tight freq mp2/aug-cc-pvtz scrf=(cpcm,solvent= water))

|    |             |             |             |
|----|-------------|-------------|-------------|
| Se | 0.38513000  | -0.22935500 | -0.36049400 |
| O  | -0.16686700 | 1.46707200  | -0.39131700 |
| H  | -1.11025400 | 1.45362600  | -0.10676200 |
| C  | 0.82781500  | -0.35910300 | 1.50979200  |
| H  | 1.24913100  | -1.35284700 | 1.66054200  |
| H  | 1.57693900  | 0.39111400  | 1.74426300  |
| H  | -0.06744400 | -0.23090700 | 2.11090800  |
| O  | -2.76000400 | 1.23754500  | 0.45487100  |
| H  | -3.43358300 | 1.78546200  | 0.04203900  |
| H  | -3.00145700 | 0.31608200  | 0.23996500  |

|   |             |             |             |
|---|-------------|-------------|-------------|
| O | 3.73932400  | 0.03378600  | 0.02519000  |
| H | 4.36324400  | 0.46561700  | -0.56519100 |
| H | 2.88892600  | 0.10332100  | -0.43172000 |
| O | -2.78331400 | -1.41823300 | -0.26868300 |
| H | -1.81356900 | -1.35011400 | -0.33819700 |
| H | -2.94637200 | -2.19002900 | 0.28169700  |

**Table S1.** NMR data for  $\text{CH}_3\text{Se}(-)\cdot n\text{H}_2\text{O}$  ( $n = 1-6$ ),  $\text{CH}_3\text{SeH}\cdot k\text{H}_2\text{O}$  ( $k = 0, 2$ ),  $\text{CH}_3\text{SeOH}\cdot m\text{H}_2\text{O}$  ( $m = 0, 3$ ): shielding constants  $\sigma_{\text{Se}}$  and chemical shifts  $\delta_{\text{Se}} = \sigma_{\text{Se,ref}} - \sigma_{\text{Se,complex}}$ , where  $\sigma_{\text{Se,ref}}$  shielding constant of neat  $(\text{CH}_3)_2\text{Se}$ ,  $\sigma_{\text{Se,ref}} = 1994.23$  ppm.

|                                                    | $\sigma_{\text{Se}}$ , ppm | $\delta_{\text{Se}}$ , ppm |
|----------------------------------------------------|----------------------------|----------------------------|
| $\text{CH}_3\text{Se}(-)$                          | 2215.29                    | -221.06                    |
| $\text{CH}_3\text{Se}(-)\cdot\text{H}_2\text{O}$   | 2252.11                    | -257.88                    |
| $\text{CH}_3\text{Se}(-)\cdot 2\text{H}_2\text{O}$ | 2360.33                    | -366.10                    |
| $\text{CH}_3\text{Se}(-)\cdot 3\text{H}_2\text{O}$ | 2368.34                    | -374.11                    |
| $\text{CH}_3\text{Se}(-)\cdot 4\text{H}_2\text{O}$ | 2335.19                    | -340.96                    |
| $\text{CH}_3\text{Se}(-)\cdot 5\text{H}_2\text{O}$ | 2325.92                    | -331.69                    |
| $\text{CH}_3\text{Se}(-)\cdot 6\text{H}_2\text{O}$ | 2319.15                    | -324.93                    |

  

|                                                  |         |         |
|--------------------------------------------------|---------|---------|
| $\text{CH}_3\text{SeH}$                          | 2165.99 | -171.77 |
| $\text{CH}_3\text{SeH}\cdot 2\text{H}_2\text{O}$ | 2215.70 | -221.47 |

  

|                                                   |         |         |
|---------------------------------------------------|---------|---------|
| $\text{CH}_3\text{SeOH}$                          | 924.68  | 1069.54 |
| $\text{CH}_3\text{SeOH}\cdot 3\text{H}_2\text{O}$ | 1113.50 | 880.73  |
